# Supplementary material for: Drink Choice is Important: Beverages Make a Substantial Contribution to Energy, Sugar, Calcium and Vitamin C Intake among Australians
Source: PubMed Central journal article supplement (PMC6627926; doi:10.3390/nu11061389), 2019-06-20
Supplement: nutrients-11-01389-s001.pdf [file nutrients-11-01389-s001.pdf]

Supplementary Table 1: Mean beverage intake (g) and 10<sup>th</sup>, 90<sup>th</sup> percentile for those who consumed any of the beverage category on the day of the survey

| Age Group (yrs)      | Males                                                              |                    | Females                                                            |                    | p                        | Total                                                              |                    |
|----------------------|--------------------------------------------------------------------|--------------------|--------------------------------------------------------------------|--------------------|--------------------------|--------------------------------------------------------------------|--------------------|
|                      | Mean <sup>1</sup> (g)<br>(10 <sup>th</sup> -90 <sup>th</sup> %ile) | n <sup>2</sup> (%) | Mean <sup>1</sup> (g)<br>(10 <sup>th</sup> -90 <sup>th</sup> %ile) | n <sup>2</sup> (%) | Mean (Male vs<br>female) | Mean <sup>1</sup> (g)<br>(10 <sup>th</sup> -90 <sup>th</sup> %ile) | n <sup>2</sup> (%) |
| <b>All Beverages</b> |                                                                    |                    |                                                                    |                    |                          |                                                                    |                    |
| 2-3                  | 1062 (267-1910)                                                    | 227 (99.6%)        | 932 (350-1530)                                                     | 235 (99.6%)        | 0.037                    | 999 <sup>a</sup> (307-1651)                                        | 462 (99.6%)        |
| 4-8                  | 1200 (510-2000)                                                    | 395 (99.5%)        | 1121 (549-1763)                                                    | 392 (100.0%)       | 0.055                    | 1162 <sup>a</sup> (538-1937)                                       | 787 (99.7%)        |
| 9-13                 | 1543 (580-2505)                                                    | 391 (99.7%)        | 1470 (574-2519)                                                    | 395 (100.0%)       | 0.151                    | 1506 <sup>b</sup> (574-2504)                                       | 786 (99.9%)        |
| 14-18                | 2079 (785-3718)                                                    | 402 (99.8%)        | 1630 (716-2665)                                                    | 369 (100.0%)       | <0.001                   | 1867 <sup>c</sup> (784-3273)                                       | 771 (99.9%)        |
| 2-18                 | 1547 (586-2759)                                                    | 1415 (99.6%)       | 1356 (574-2343)                                                    | 1391 (99.9%)       | <0.001                   | 1454 (584-2531)                                                    | 2806 (99.8%)       |
| 19-30                | 2715 (1015-4804)                                                   | 739 (100.0%)       | 2034 (945-3183)                                                    | 853 (100.0%)       | <0.001                   | 2383 <sup>d</sup> (975-4000)                                       | 1592 (100.0%)      |
| 31-50                | 2619 (1091-4524)                                                   | 1669 (100.0%)      | 2182 (1021-3533)                                                   | 1895 (99.9%)       | <0.001                   | 2406 <sup>d</sup> (1069-3950)                                      | 3564 (100.0%)      |
| 51-70                | 2252 (985-3750)                                                    | 1338 (99.8%)       | 2086 (893-3426)                                                    | 1565 (100.0%)      | <0.001                   | 2169 <sup>e</sup> (940-3540)                                       | 2903 (99.9%)       |
| 71+                  | 1723 (808-2873)                                                    | 532 (99.8%)        | 1688 (715-2805)                                                    | 744 (99.9%)        | 0.52                     | 1703 <sup>c</sup> (747-2807)                                       | 1276 (99.8%)       |
| 19+                  | 2465 (1000-4222)                                                   | 4278 (99.9%)       | 2065 (929-3374)                                                    | 5057 (100.0%)      | <0.001                   | 2265 (968-3755)                                                    | 9335 (99.9%)       |
| Total                | 2258 (862-3909)                                                    | 5693 (99.8%)       | 1910 (787-3235)                                                    | 6448 (100.0%)      | <0.001                   | 2086 (826-3551)                                                    | 12141 (99.9%)      |
| <b>Tea</b>           |                                                                    |                    |                                                                    |                    |                          |                                                                    |                    |
| 2-3                  | - <sup>3</sup>                                                     | -                  | -                                                                  | -                  |                          | -                                                                  | -                  |
| 4-8                  | -                                                                  | -                  | -                                                                  | -                  |                          | 205 <sup>a</sup> (49-338)                                          | 30 (3.8%)          |
| 9-13                 | -                                                                  | -                  | 387 (186-1000)                                                     | 36 (9.1%)          |                          | 385 <sup>a,b</sup> (150-1000)                                      | 55 (7.0%)          |
| 14-18                | 434 (50-625)                                                       | 37 (9.2%)          | 346 (200-534)                                                      | 59 (16.0%)         | 0.035                    | 396 <sup>a</sup> (200-584)                                         | 96 (12.4%)         |
| 2-18                 | 394 (80-633)                                                       | 72 (5.1%)          | 322 (185-530)                                                      | 119 (8.5%)         | 0.042                    | 356 (129-611)                                                      | 191 (6.8%)         |
| 19-30                | 375 (229-660)                                                      | 136 (18.4%)        | 441 (207-819)                                                      | 293 (34.3%)        | 0.002                    | 416 <sup>a</sup> (221-785)                                         | 429 (26.9%)        |
| 31-50                | 511 (200-1000)                                                     | 583 (34.9%)        | 534 (200-1032)                                                     | 950 (50.1%)        | 0.31                     | 524 <sup>b</sup> (200-1004)                                        | 1533 (43.0%)       |
| 51-70                | 584 (207-1225)                                                     | 687 (51.2%)        | 597 (181-1103)                                                     | 1003 (64.1%)       | 0.59                     | 591 <sup>c</sup> (200-1155)                                        | 1690 (58.2%)       |
| 71+                  | 515 (198-1130)                                                     | 335 (62.9%)        | 574 (190-1136)                                                     | 528 (70.9%)        | 0.066                    | 550 <sup>b</sup> (191-1128)                                        | 863 (67.5%)        |
| 19+                  | 520 (202-1017)                                                     | 1741 (40.7%)       | 546 (200-1044)                                                     | 2774 (54.8%)       | 0.047                    | 535 (200-1033)                                                     | 4515 (48.3%)       |
| Total                | 514 (200-1012)                                                     | 1813 (31.8%)       | 537 (200-1031)                                                     | 2893 (44.8%)       | 0.066                    | 527 (200-1022)                                                     | 4706 (38.7%)       |
| <b>Coffee</b>        |                                                                    |                    |                                                                    |                    |                          |                                                                    |                    |
| 2-3                  | -                                                                  | -                  | -                                                                  | -                  |                          | -                                                                  | -                  |

|                    |                |              |                |              |        |                               |              |
|--------------------|----------------|--------------|----------------|--------------|--------|-------------------------------|--------------|
| 4-8                | -              | -            | -              | -            | -      | -                             | -            |
| 9-13               | -              | -            | -              | -            | -      | -                             | -            |
| 14-18              | 301 (205-504)  | 53 (13.2%)   | 311 (146-635)  | 47 (12.7%)   | 0.71   | 305 <sup>a</sup> (160-582)    | 100 (13.0%)  |
| 2-18               | 307 (203-539)  | 57 (4.0%)    | 311 (127-635)  | 54 (3.9%)    | 0.88   | 308 (160-582)                 | 111 (3.9%)   |
| 19-30              | 377 (200-702)  | 265 (35.9%)  | 363 (200-660)  | 320 (37.5%)  | 0.45   | 370 <sup>a,b</sup> (200-671)  | 585 (36.7%)  |
| 31-50              | 519 (200-936)  | 1071 (64.2%) | 477 (200-881)  | 1144 (60.3%) | 0.011  | 498 <sup>c</sup> (200-919)    | 2215 (62.1%) |
| 51-70              | 512 (181-1035) | 920 (68.6%)  | 481 (166-981)  | 1037 (66.3%) | 0.12   | 497 <sup>c</sup> (174-1018)   | 1957 (67.3%) |
| 71+                | 421 (180-758)  | 347 (65.1%)  | 399 (136-714)  | 498 (66.8%)  | 0.35   | 409 <sup>b</sup> (153-731)    | 845 (66.1%)  |
| 19+                | 487 (200-936)  | 2603 (60.8%) | 453 (181-850)  | 2999 (59.3%) | 0.001  | 470 (187-905)                 | 5602 (60.0%) |
| Total              | 481 (200-924)  | 2660 (46.7%) | 450 (181-842)  | 3053 (47.3%) | 0.002  | 466 (187-890)                 | 5713 (47.0%) |
| <b>Fruit Juice</b> |                |              |                |              |        |                               |              |
| 2-3                | 345 (84-818)   | 101 (44.3%)  | 276 (94-505)   | 92 (39.0%)   | 0.16   | 313 <sup>a</sup> (84-629)     | 193 (41.6%)  |
| 4-8                | 303 (130-526)  | 169 (42.6%)  | 300 (131-512)  | 155 (39.5%)  | 0.12   | 301 <sup>a</sup> (130-520)    | 324 (41.1%)  |
| 9-13               | 348 (158-728)  | 152 (38.8%)  | 347 (208-693)  | 152 (38.5%)  | 0.98   | 347 <sup>a,b</sup> (185-725)  | 304 (38.6%)  |
| 14-18              | 466 (210-914)  | 137 (34.0%)  | 373 (208-686)  | 131 (35.5%)  | 0.002  | 414 <sup>b,c</sup> (208-745)  | 268 (34.7%)  |
| 2-18               | 356 (131-735)  | 559 (39.4%)  | 333 (150-565)  | 530 (38.1%)  | 0.09   | 344 (147-630)                 | 1089 (38.7%) |
| 19-30              | 476 (260-756)  | 218 (29.5%)  | 378 (156-732)  | 214 (25.1%)  | 0.001  | 433 <sup>c</sup> (208-756)    | 432 (27.1%)  |
| 31-50              | 443 (156-840)  | 359 (21.5%)  | 360 (158-645)  | 370 (19.5%)  | <0.001 | 406 <sup>c</sup> (158-735)    | 729 (20.4%)  |
| 51-70              | 342 (156-618)  | 278 (20.7%)  | 350 (105-634)  | 298 (19.0%)  | 0.67   | 346 <sup>a</sup> (141-634)    | 576 (19.8%)  |
| 71+                | 303 (154-472)  | 120 (22.5%)  | 335 (146-737)  | 167 (22.4%)  | 0.32   | 322 <sup>a</sup> (147-616)    | 287 (22.5%)  |
| 19+                | 420 (158-749)  | 975 (22.8%)  | 360 (147-651)  | 1049 (20.7%) | <0.001 | 391 (156-733)                 | 2024 (21.7%) |
| Total              | 400 (156-742)  | 1534 (26.9%) | 350 (147-634)  | 1579 (24.5%) | <0.001 | 376 (156-728)                 | 3113 (25.6%) |
| <b>Cordial</b>     |                |              |                |              |        |                               |              |
| 2-3                | 416 (73-972)   | 28 (12.3%)   | 429 (77-1649)  | 26 (11.0%)   | 0.94   | 422 <sup>a,b</sup> (78-1039)  | 54 (11.6%)   |
| 4-8                | 425 (148-816)  | 52 (13.1%)   | 384 (147-788)  | 35 (8.9%)    | 0.48   | 408 <sup>a</sup> (147-788)    | 87 (11.0%)   |
| 9-13               | 480 (210-735)  | 57 (14.5%)   | 379 (146-630)  | 40 (10.1%)   | 0.06   | 440 <sup>a</sup> (210-735)    | 97 (12.3%)   |
| 14-18              | 541 (290-1026) | 42 (10.4%)   | 439 (354-687)  | 32 (8.7%)    | 0.09   | 504 <sup>a,c</sup> (301-922)  | 74 (9.6%)    |
| 2-18               | 469 (204-815)  | 179 (12.6%)  | 398 (147-756)  | 133 (9.6%)   | 0.05   | 441 (163-788)                 | 312 (11.1%)  |
| 19-30              | 671 (239-1132) | 65 (8.8%)    | 567 (258-1313) | 60 (7.0%)    | 0.24   | 637 <sup>b,c</sup> (261-1114) | 125 (7.9%)   |
| 31-50              | 795 (210-1890) | 134 (8.0%)   | 549 (257-982)  | 105 (5.5%)   | <0.001 | 698 <sup>c</sup> (210-1530)   | 239 (6.7%)   |
| 51-70              | 602 (203-1102) | 84 (6.3%)    | 509 (180-1200) | 72 (4.6%)    | 0.27   | 560 <sup>a,c</sup> (200-1078) | 156 (5.4%)   |
| 71+                | 545 (46-1411)  | 27 (5.1%)    | 267 (134-723)  | 23 (3.1%)    | 0.03   | 446 <sup>a,c</sup> (85-1088)  | 50 (3.9%)    |

|                      |                |              |                |              |        |                             |              |
|----------------------|----------------|--------------|----------------|--------------|--------|-----------------------------|--------------|
| 19+                  | 700 (210-1530) | 310 (7.2%)   | 527 (210-1050) | 260 (5.1%)   | <0.001 | 633 (210-1446)              | 570 (6.1%)   |
| Total                | 624 (210-1320) | 489 (8.6%)   | 483 (202-927)  | 393 (6.1%)   | <0.001 | 569 (210-1061)              | 882 (7.3%)   |
| <b>Soft drinks</b>   |                |              |                |              |        |                             |              |
| 2-3                  | -              | -            | -              | -            |        | 194 <sup>ab</sup> (91-390)  | 32 (6.9%)    |
| 4-8                  | 263 (104-390)  | 63 (15.9%)   | 279 (97-437)   | 81 (20.7%)   | 0.44   | 272 <sup>a</sup> (104-390)  | 144 (18.3%)  |
| 9-13                 | 430 (195-750)  | 140 (35.7%)  | 404 (195-780)  | 128 (32.4%)  | 0.40   | 418 <sup>b</sup> (195-757)  | 268 (34.1%)  |
| 14-18                | 626 (208-1305) | 202 (50.1%)  | 406 (198-624)  | 149 (40.4%)  | <0.001 | 530 <sup>c</sup> (208-1055) | 351 (45.5%)  |
| 2-18                 | 485 (160-1040) | 421 (29.6%)  | 368 (156-624)  | 374 (26.9%)  | <0.001 | 430 (160-754)               | 795 (28.3%)  |
| 19-30                | 610 (260-1060) | 320 (43.3%)  | 503 (250-780)  | 297 (34.8%)  | <0.001 | 562 <sup>c</sup> (260-1016) | 617 (38.8%)  |
| 31-50                | 589 (260-1125) | 572 (34.3%)  | 487 (208-780)  | 519 (27.4%)  | <0.001 | 547 <sup>c</sup> (250-1011) | 1091 (30.6%) |
| 51-70                | 610 (208-1276) | 318 (23.7%)  | 443 (200-750)  | 298 (19.0%)  | <0.001 | 542 <sup>c</sup> (208-1092) | 616 (21.2%)  |
| 71+                  | 459 (156-894)  | 76 (14.3%)   | 355 (156-632)  | 95 (12.8%)   | 0.061  | 408 <sup>b</sup> (156-778)  | 171 (13.4%)  |
| 19+                  | 596 (260-1125) | 1286 (30.0%) | 478 (208-780)  | 1209 (23.9%) | <0.001 | 545 (208-1014)              | 2495 (26.7%) |
| Total                | 572 (208-1102) | 1707 (29.9%) | 451 (200-757)  | 1583 (24.5%) | <0.001 | 519 (208-970)               | 3290 (27.1%) |
| <b>Energy drinks</b> |                |              |                |              |        |                             |              |
| 2-3                  | -              | -            | -              | -            |        | -                           | -            |
| 4-8                  | -              | -            | -              | -            |        | -                           | -            |
| 9-13                 | -              | -            | -              | -            |        | -                           | -            |
| 14-18                | 573 (394-624)  | 27 (6.7%)    | -              | -            |        | 564 <sup>a</sup> (263-624)  | 46 (6.0%)    |
| 2-18                 | 567 (335-624)  | 33 (2.3%)    | 471 (260-853)  | 27 (1.9%)    | 0.11   | 541 (261-624)               | 60 (2.1%)    |
| 19-30                | 751 (264-1560) | 78 (10.6%)   | 358 (210-575)  | 28 (3.3%)    | <0.001 | 622 <sup>a</sup> (252-1560) | 106 (6.7%)   |
| 31-50                | 590 (174-1248) | 80 (4.8%)    | 631 (233-1483) | 19 (1.0%)    | 0.65   | 598 <sup>a</sup> (203-1248) | 99 (2.8%)    |
| 51-70                | -              | -            | -              | -            |        | 546 <sup>a</sup> (252-1040) | 24 (0.8%)    |
| 71+                  | -              | -            | -              | -            |        | -                           | -            |
| 19+                  | 672 (263-1506) | 177 (4.1%)   | 432 (210-624)  | 57 (1.1%)    | <0.001 | 606 (251-1303)              | 234 (2.5%)   |
| Total                | 650 (263-1303) | 210 (3.7%)   | 440 (226-624)  | 84 (1.3%)    | <0.001 | 593 (252-1248)              | 294 (2.4%)   |
| <b>Oth beverages</b> |                |              |                |              |        |                             |              |
| 2-3                  | -              | -            | -              | -            |        | 91 <sup>a</sup> (4-281)     | 22 (4.7%)    |
| 4-8                  | 162 (8-258)    | 25 (6.3%)    | -              | -            |        | 156 <sup>ab</sup> (5-295)   | 45 (5.7%)    |
| 9-13                 | 169 (8-266)    | 34 (8.7%)    | 128 (6-311)    | 21 (5.3%)    | 0.24   | 158 <sup>ab</sup> (8-266)   | 55 (7.0%)    |
| 14-18                | 243 (190-263)  | 21 (5.2%)    | 210 (13-258)   | 20 (5.4%)    | 0.20   | 224 <sup>ab</sup> (129-258) | 41 (5.3%)    |
| 2-18                 | 174 (8-266)    | 91 (6.4%)    | 155 (7-265)    | 72 (5.2%)    | 0.32   | 166 (8-265)                 | 163 (5.8%)   |

|                       |                |             |                |             |        |                                |              |
|-----------------------|----------------|-------------|----------------|-------------|--------|--------------------------------|--------------|
| 19-30                 | 231 (20-339)   | 29 (3.9%)   | 236 (12-618)   | 46 (5.4%)   | 0.84   | 234 <sup>b</sup> (12-516)      | 75 (4.7%)    |
| 31-50                 | 206 (7-258)    | 28 (1.7%)   | 216 (9-344)    | 54 (2.8%)   | 0.75   | 212 <sup>a,b</sup> (9-270)     | 82 (2.3%)    |
| 51-70                 | 251 (9-423)    | 25 (1.9%)   | 267 (11-905)   | 33 (2.1%)   | 0.88   | 259 <sup>b</sup> (10-410)      | 58 (2.0%)    |
| 71+                   | -              | -           | -              | -           |        | 178 <sup>a,b</sup> (10-258)    | 31 (2.4%)    |
| 19+                   | 227 (17-339)   | 94 (2.2%)   | 229 (10-531)   | 152 (3.0%)  | 0.94   | 228 (11-396)                   | 246 (2.6%)   |
| Total                 | 203 (9-339)    | 185 (3.2%)  | 204 (10-408)   | 224 (3.5%)  | 0.96   | 203 (9-339)                    | 409 (3.4%)   |
| <b>Plain milk</b>     |                |             |                |             |        |                                |              |
| 2-3                   | 345 (103-776)  | 124 (54.4%) | 380 (103-743)  | 131 (55.5%) | 0.39   | 361 <sup>a,c</sup> (103-773)   | 255 (55.0%)  |
| 4-8                   | 256 (128-464)  | 121 (30.5%) | 286 (52-569)   | 130 (33.2%) | 0.21   | 270 <sup>b</sup> (93-517)      | 251 (31.8%)  |
| 9-13                  | 357 (156-642)  | 87 (22.2%)  | 342 (198-623)  | 97 (24.6%)  | 0.60   | 348 <sup>c,d</sup> (156-627)   | 184 (23.4%)  |
| 14-18                 | 446 (256-740)  | 56 (13.9%)  | 438 (206-1021) | 43 (11.7%)  | 0.90   | 442 <sup>a</sup> (243-735)     | 99 (12.8%)   |
| 2-18                  | 330 (127-624)  | 388 (27.3%) | 344 (129-628)  | 401 (28.8%) | 0.44   | 337 (129-624)                  | 789 (28.1%)  |
| 19-30                 | 463 (214-927)  | 92 (12.4%)  | 364 (31-680)   | 85 (10.0%)  | 0.005  | 431 <sup>a</sup> (93-927)      | 177 (11.1%)  |
| 31-50                 | 336 (58-607)   | 149 (8.9%)  | 231 (32-412)   | 133 (7.0%)  | <0.001 | 288 <sup>b,d</sup> (52-515)    | 282 (7.9%)   |
| 51-70                 | 300 (30-519)   | 123 (9.2%)  | 186 (31-368)   | 119 (7.6%)  | 0.001  | 241 <sup>b</sup> (31-464)      | 242 (8.3%)   |
| 71+                   | 259 (23-746)   | 47 (8.8%)   | 252 (42-535)   | 64 (8.6%)   | 0.89   | 255 <sup>b</sup> (31-535)      | 111 (8.7%)   |
| 19+                   | 375 (62-773)   | 411 (9.6%)  | 256 (31-516)   | 401 (7.9%)  | <0.001 | 322 (42-627)                   | 812 (8.7%)   |
| Total                 | 356 (103-711)  | 799 (14.0%) | 297 (53-603)   | 802 (12.4%) | <0.001 | 329 (73-624)                   | 1601 (13.2%) |
| <b>Flavoured milk</b> |                |             |                |             |        |                                |              |
| 2-3                   | 368 (83-912)   | 38 (16.7%)  | 327 (167-593)  | 43 (18.2%)  | 0.55   | 346 <sup>a,b,c</sup> (142-621) | 81 (17.5%)   |
| 4-8                   | 325 (153-530)  | 85 (21.4%)  | 274 (157-520)  | 75 (19.1%)  | 0.042  | 302 <sup>a</sup> (156-529)     | 160 (20.3%)  |
| 9-13                  | 398 (227-636)  | 97 (24.7%)  | 408 (211-726)  | 95 (24.1%)  | 0.76   | 403 <sup>b,c</sup> (218-726)   | 192 (24.4%)  |
| 14-18                 | 431 (265-764)  | 80 (19.9%)  | 479 (199-999)  | 73 (19.8%)  | 0.33   | 455 <sup>b,d</sup> (210-875)   | 153 (19.8%)  |
| 2-18                  | 381 (210-660)  | 300 (21.1%) | 383 (170-674)  | 286 (20.5%) | 0.98   | 382 (195-672)                  | 586 (20.8%)  |
| 19-30                 | 526 (312-795)  | 98 (13.3%)  | 479 (215-795)  | 107 (12.5%) | 0.23   | 506 <sup>d</sup> (268-795)     | 205 (12.9%)  |
| 31-50                 | 544 (263-951)  | 177 (10.6%) | 387 (215-617)  | 184 (9.7%)  | <0.001 | 476 <sup>c,d</sup> (223-795)   | 361 (10.1%)  |
| 51-70                 | 464 (206-1011) | 107 (8.0%)  | 378 (205-712)  | 112 (7.2%)  | 0.044  | 425 <sup>b,d</sup> (206-743)   | 219 (7.5%)   |
| 71+                   | 328 (59-768)   | 40 (7.5%)   | 374 (208-619)  | 69 (9.3%)   | 0.38   | 354 <sup>a,b</sup> (127-661)   | 109 (8.5%)   |
| 19+                   | 508 (261-874)  | 422 (9.9%)  | 412 (212-682)  | 472 (9.3%)  | <0.001 | 466 (218-795)                  | 894 (9.6%)   |
| Total                 | 463 (218-795)  | 722 (12.7%) | 400 (210-679)  | 758 (11.8%) | <0.001 | 434 (212-742)                  | 1480 (12.2%) |
| <b>Milk alts</b>      |                |             |                |             |        |                                |              |
| 2-3                   | -              | -           | -              | -           |        | -                              | -            |

|                |                 |              |                 |              |        |                                 |              |
|----------------|-----------------|--------------|-----------------|--------------|--------|---------------------------------|--------------|
| 4-8            | -               | -            | -               | -            | -      | -                               | -            |
| 9-13           | -               | -            | -               | -            | -      | -                               | -            |
| 14-18          | -               | -            | -               | -            | -      | -                               | -            |
| 2-18           | -               | -            | -               | -            | -      | 283 (72-531)                    | 32 (1.1%)    |
| 19-30          | -               | -            | -               | -            | -      | -                               | -            |
| 31-50          | -               | -            | 275 (33-746)    | 21 (1.1%)    | -      | 307 <sup>a</sup> (65-566)       | 35 (1.0%)    |
| 51-70          | -               | -            | -               | -            | -      | 257 <sup>a</sup> (82-475)       | 25 (0.9%)    |
| 71+            | -               | -            | -               | -            | -      | -                               | -            |
| 19+            | 349 (237-524)   | 24 (0.6%)    | 256 (57-361)    | 53 (1.0%)    | 0.006  | 287 (82-412)                    | 77 (0.8%)    |
| Total          | 347 (206-572)   | 41 (0.7%)    | 253 (72-361)    | 68 (1.1%)    | 0.002  | 286 (82-444)                    | 109 (0.9%)   |
| <b>Alcohol</b> |                 |              |                 |              |        |                                 |              |
| 2-3            | -               | -            | -               | -            | -      | -                               | -            |
| 4-8            | -               | -            | -               | -            | -      | -                               | -            |
| 9-13           | -               | -            | -               | -            | -      | -                               | -            |
| 14-18          | 1022 (258-2318) | 24 (6.0%)    | -               | -            | -      | 961 <sup>a,b,c</sup> (258-2318) | 29 (3.8%)    |
| 2-18           | 911 (29-2318)   | 26 (1.8%)    | -               | -            | -      | 862 (29-2318)                   | 34 (1.2%)    |
| 19-30          | 1124 (253-2274) | 238 (32.2%)  | 633 (29-1719)   | 156 (18.3%)  | <0.001 | 962 <sup>a</sup> (159-2000)     | 394 (24.7%)  |
| 31-50          | 1089 (248-2587) | 672 (40.3%)  | 510 (139-1010)  | 493 (26.0%)  | <0.001 | 867 <sup>a,b</sup> (150-2000)   | 1165 (32.7%) |
| 51-70          | 940 (249-1945)  | 617 (46.0%)  | 473 (70-974)    | 503 (32.1%)  | <0.001 | 751 <sup>c</sup> (149-1529)     | 1120 (38.5%) |
| 71+            | 516 (89-1139)   | 225 (42.2%)  | 348 (71-750)    | 176 (23.6%)  | <0.001 | 448 <sup>d</sup> (75-994)       | 401 (31.4%)  |
| 19+            | 995 (238-2273)  | 1752 (40.9%) | 500 (99-1010)   | 1328 (26.3%) | <0.001 | 806 (149-1818)                  | 3080 (33.0%) |
| Total          | 993 (235-2273)  | 1778 (31.2%) | 500 (99-1010)   | 1336 (20.7%) | <0.001 | 807 (149-1818)                  | 3114 (25.6%) |
| <b>Water</b>   |                 |              |                 |              |        |                                 |              |
| 2-3            | 647 (90-1370)   | 201 (88.2%)  | 568 (200-1000)  | 203 (86.0%)  | 0.13   | 608 <sup>a</sup> (129-1000)     | 404 (87.1%)  |
| 4-8            | 817 (240-1500)  | 371 (93.5%)  | 781 (250-1425)  | 369 (94.1%)  | 0.37   | 800 <sup>a,b</sup> (240-1500)   | 740 (93.8%)  |
| 9-13           | 1012 (250-2000) | 363 (92.6%)  | 1021 (276-2000) | 362 (91.6%)  | 0.84   | 1017 <sup>c</sup> (250-2000)    | 725 (92.1%)  |
| 14-18          | 1448 (350-3000) | 347 (86.1%)  | 1157 (350-2000) | 329 (89.2%)  | <0.001 | 1305 <sup>d</sup> (350-2449)    | 676 (87.6%)  |
| 2-18           | 1026 (250-2000) | 1282 (90.3%) | 938 (250-2000)  | 1263 (90.7%) | 0.003  | 983 (250-2000)                  | 2545 (90.5%) |
| 19-30          | 1581 (360-3000) | 666 (90.1%)  | 1354 (400-2400) | 758 (88.9%)  | <0.001 | 1472 <sup>e</sup> (360-3000)    | 1424 (89.4%) |
| 31-50          | 1438 (360-2813) | 1373 (82.3%) | 1338 (360-2491) | 1678 (88.5%) | 0.004  | 1388 <sup>d</sup> (360-2500)    | 3051 (85.6%) |
| 51-70          | 1131 (250-2000) | 972 (72.5%)  | 1171 (291-2000) | 1364 (87.2%) | 0.29   | 1152 <sup>f</sup> (280-2000)    | 2336 (80.4%) |
| 71+            | 895 (200-1800)  | 405 (76.0%)  | 912 (250-2000)  | 637 (85.5%)  | 0.73   | 905 <sup>b,c</sup> (250-2000)   | 1042 (81.5%) |

|       |                 |              |                 |              |        |                 |               |
|-------|-----------------|--------------|-----------------|--------------|--------|-----------------|---------------|
| 19+   | 1357 (330-2608) | 3416 (79.8%) | 1250 (350-2200) | 4437 (87.7%) | <0.001 | 1302 (350-2434) | 7853 (84.1%)  |
| Total | 1277 (290-2500) | 4698 (82.4%) | 1180 (310-2054) | 5700 (88.4%) | <0.001 | 1227 (300-2250) | 10398 (85.6%) |

<sup>1</sup>weighted mean, <sup>2</sup>sample n, <sup>3</sup>Summary data is not provided when cell count ≤20 individuals

Supplementary Table 2: Percentage contribution to energy, calcium, vitamin C, and total sugar intake for those who consumed the beverage (i.e. on the day that food intake was measured) and for the population.

| Age grp (yrs)        | % of Energy Intake <sup>1</sup> |                       | % of Calcium Intake   |                       | % of Vitamin C Intake |                     | % of Total Sugar Intake |                       |
|----------------------|---------------------------------|-----------------------|-----------------------|-----------------------|-----------------------|---------------------|-------------------------|-----------------------|
|                      | Consumers                       | Population            | Consumers             | Population            | Consumers             | Population          | Consumers               | Population            |
| <b>All Beverages</b> |                                 |                       |                       |                       |                       |                     |                         |                       |
| 2-3                  | 16.1 <sup>b,d,e</sup>           | 16.0 <sup>b,d,e</sup> | 35.2 <sup>e</sup>     | 35.1 <sup>e</sup>     | 27.2 <sup>a,b</sup>   | 27.1 <sup>a,b</sup> | 32.5 <sup>a,b,c</sup>   | 32.4 <sup>a,b,c</sup> |
| 4-8                  | 11.4 <sup>a</sup>               | 11.4 <sup>a</sup>     | 24.4 <sup>a</sup>     | 24.3 <sup>a</sup>     | 27.6 <sup>a</sup>     | 27.5 <sup>a</sup>   | 29.1 <sup>b,f</sup>     | 29.1 <sup>b,f</sup>   |
| 9-13                 | 12.5 <sup>a,b</sup>             | 12.5 <sup>a,b</sup>   | 26.1 <sup>a,b,d</sup> | 26.0 <sup>a,b,d</sup> | 30.0 <sup>a</sup>     | 29.9 <sup>a</sup>   | 35.3 <sup>c,e</sup>     | 35.2 <sup>c,e</sup>   |
| 14-18                | 14.1 <sup>b,c</sup>             | 14.1 <sup>b,c</sup>   | 24.6 <sup>a,b</sup>   | 24.6 <sup>a,b</sup>   | 26.8 <sup>a,b</sup>   | 26.8 <sup>a,b</sup> | 43.0 <sup>d</sup>       | 43.0 <sup>d</sup>     |
| 2-18                 | 13.1                            | 13.0                  | 26.2                  | 26.2                  | 28.1                  | 28.1                | 35.4                    | 35.4                  |
| 19-30                | 17.1 <sup>d,e</sup>             | 17.1 <sup>d,e</sup>   | 28.1 <sup>c,d</sup>   | 28.1 <sup>c,d</sup>   | 27.7 <sup>a</sup>     | 27.7 <sup>a</sup>   | 43.1 <sup>d</sup>       | 43.1 <sup>d</sup>     |
| 31-50                | 17.5 <sup>e</sup>               | 17.5 <sup>e</sup>     | 30.4 <sup>e</sup>     | 30.4 <sup>e</sup>     | 21.4 <sup>b</sup>     | 21.4 <sup>b</sup>   | 38.3 <sup>e</sup>       | 38.3 <sup>e</sup>     |
| 51-70                | 15.7 <sup>c,d</sup>             | 15.7 <sup>c,d</sup>   | 27.4 <sup>c</sup>     | 27.4 <sup>c</sup>     | 20.6 <sup>b</sup>     | 20.6 <sup>b</sup>   | 29.9 <sup>a,b</sup>     | 29.9 <sup>a,b</sup>   |
| 71+                  | 13.6 <sup>b</sup>               | 13.6 <sup>b</sup>     | 25.8 <sup>b,c</sup>   | 25.7 <sup>b,c</sup>   | 18.4 <sup>b</sup>     | 18.4 <sup>b</sup>   | 25.3 <sup>f</sup>       | 25.3 <sup>f</sup>     |
| 19+                  | 16.6                            | 16.6                  | 28.5                  | 28.5                  | 22.4                  | 22.4                | 35.8                    | 35.8                  |
| Total                | 15.8                            | 15.8                  | 28.0                  | 28.0                  | 23.7                  | 23.7                | 35.8                    | 35.7                  |
| <b>Tea</b>           |                                 |                       |                       |                       |                       |                     |                         |                       |
| 2-3                  | -                               | -                     | -                     | -                     | -                     | -                   | -                       | -                     |
| 4-8                  | 3.4 <sup>a,b</sup>              | 0.2 <sup>a</sup>      | 6.5 <sup>a,b,c</sup>  | 0.3 <sup>a</sup>      | <0.1 <sup>a,b</sup>   | <0.1 <sup>a</sup>   | 8.6 <sup>a,b</sup>      | 0.4 <sup>a</sup>      |
| 9-13                 | 5.6 <sup>b,c</sup>              | 0.4 <sup>a</sup>      | 14.5 <sup>a,b</sup>   | 0.9 <sup>a,b</sup>    | <0.1 <sup>a,b</sup>   | <0.1 <sup>a</sup>   | 14.8 <sup>b</sup>       | 0.9 <sup>a,b</sup>    |
| 14-18                | 4.2 <sup>b</sup>                | 0.6 <sup>b</sup>      | 10.2 <sup>b</sup>     | 1.5 <sup>b</sup>      | 0.1 <sup>a,b</sup>    | <0.1 <sup>a,b</sup> | 13.8 <sup>b</sup>       | 2.0 <sup>b</sup>      |
| 2-18                 | 4.4                             | 0.3                   | 10.6                  | 0.8                   | <0.1                  | <0.1                | 13.0                    | 1.0                   |
| 19-30                | 2.4 <sup>a</sup>                | 0.7 <sup>c</sup>      | 6.0 <sup>c</sup>      | 1.7 <sup>c</sup>      | <0.1 <sup>a,b</sup>   | <0.1 <sup>b,c</sup> | 7.4 <sup>a</sup>        | 2.1 <sup>c</sup>      |
| 31-50                | 2.8 <sup>a</sup>                | 1.2 <sup>d</sup>      | 7.3 <sup>a,c</sup>    | 3.1 <sup>d</sup>      | <0.1 <sup>a</sup>     | <0.1 <sup>c</sup>   | 7.9 <sup>a</sup>        | 3.4 <sup>d</sup>      |

|                    |                      |                    |                     |                     |                     |                      |                         |                      |
|--------------------|----------------------|--------------------|---------------------|---------------------|---------------------|----------------------|-------------------------|----------------------|
| 51-70              | 2.6 <sup>a</sup>     | 1.5 <sup>e</sup>   | 7.2 <sup>a,b</sup>  | 4.2 <sup>e</sup>    | 0.1 <sup>b</sup>    | 0.1 <sup>d</sup>     | 7.4 <sup>a</sup>        | 4.3 <sup>e</sup>     |
| 71+                | 2.7 <sup>a,c</sup>   | 1.8 <sup>f</sup>   | 7.6 <sup>a,c</sup>  | 5.1 <sup>e</sup>    | 0.1 <sup>a,b</sup>  | 0.1 <sup>d</sup>     | 7.2 <sup>a</sup>        | 4.8 <sup>e</sup>     |
| 19+                | 2.7                  | 1.2                | 7.1                 | 3.3                 | 0.1                 | <0.1                 | 7.6                     | 3.5                  |
| Total              | 2.7                  | 1.0                | 7.3                 | 2.7                 | 0.1                 | <0.1                 | 7.8                     | 2.9                  |
| <b>Coffee</b>      |                      |                    |                     |                     |                     |                      |                         |                      |
| 2-3                | -                    | -                  | -                   | -                   | -                   | -                    | -                       | -                    |
| 4-8                | -                    | -                  | -                   | -                   | -                   | -                    | -                       | -                    |
| 9-13               | -                    | -                  | -                   | -                   | -                   | -                    | -                       | -                    |
| 14-18              | 4.6 <sup>a,b</sup>   | 0.8 <sup>a</sup>   | 14.5 <sup>a,c</sup> | 2.6 <sup>a</sup>    | 0.1 <sup>a</sup>    | <0.1 <sup>a</sup>    | 12.7 <sup>a,b,c,d</sup> | 2.3 <sup>a</sup>     |
| 2-18               | 4.7                  | 0.3                | 14.8                | 0.8                 | 0.1                 | <0.1                 | 13.0                    | 0.7                  |
| 19-30              | 5.3 <sup>a</sup>     | 1.7 <sup>b</sup>   | 19.8 <sup>a,b</sup> | 6.4 <sup>b</sup>    | 0.6 <sup>b</sup>    | 0.2 <sup>b</sup>     | 15.3 <sup>b</sup>       | 4.9 <sup>b</sup>     |
| 31-50              | 6.3 <sup>a</sup>     | 3.9 <sup>d</sup>   | 20.9 <sup>b</sup>   | 13.1 <sup>d</sup>   | 0.9 <sup>b</sup>    | 0.5 <sup>c</sup>     | 17.1 <sup>c</sup>       | 10.7 <sup>e</sup>    |
| 51-70              | 4.9 <sup>b,c</sup>   | 3.2 <sup>c,d</sup> | 17.1 <sup>c</sup>   | 11.3 <sup>c,d</sup> | 0.5 <sup>b</sup>    | 0.3 <sup>c</sup>     | 13.5 <sup>d</sup>       | 8.9 <sup>d</sup>     |
| 71+                | 4.6 <sup>c</sup>     | 2.9 <sup>c</sup>   | 14.9 <sup>c</sup>   | 9.3 <sup>c</sup>    | 0.8 <sup>b</sup>    | 0.5 <sup>c</sup>     | 11.1 <sup>e</sup>       | 7.0 <sup>c</sup>     |
| 19+                | 5.5                  | 3.1                | 18.9                | 10.6                | 0.7                 | 0.4                  | 15.0                    | 8.4                  |
| Total              | 5.5                  | 2.5                | 18.8                | 8.4                 | 0.7                 | 0.3                  | 15.0                    | 6.7                  |
| <b>Fruit Juice</b> |                      |                    |                     |                     |                     |                      |                         |                      |
| 2-3                | 7.0 <sup>a,b,c</sup> | 2.9 <sup>c</sup>   | 3.2 <sup>a</sup>    | 1.4 <sup>c,d</sup>  | 54.5 <sup>a</sup>   | 22.9 <sup>c,d</sup>  | 25.5 <sup>a</sup>       | 10.7 <sup>a</sup>    |
| 4-8                | 6.8 <sup>b,c</sup>   | 2.9 <sup>c</sup>   | 3.9 <sup>a,b</sup>  | 1.7 <sup>d</sup>    | 54.8 <sup>a,b</sup> | 23.4 <sup>d</sup>    | 24.0 <sup>a</sup>       | 10.2 <sup>a</sup>    |
| 9-13               | 6.3 <sup>a,b,c</sup> | 2.6 <sup>c</sup>   | 4.5 <sup>b,c</sup>  | 1.8 <sup>d</sup>    | 61.5 <sup>b,c</sup> | 25.1 <sup>d</sup>    | 24.0 <sup>a</sup>       | 9.8 <sup>a</sup>     |
| 14-18              | 6.7 <sup>b,c</sup>   | 2.2 <sup>b</sup>   | 5.3 <sup>c,d</sup>  | 1.7 <sup>b,c</sup>  | 68.2 <sup>d</sup>   | 21.8 <sup>b,c</sup>  | 28.2 <sup>b</sup>       | 9.0 <sup>b</sup>     |
| 2-18               | 6.6                  | 2.6                | 4.3                 | 1.7                 | 60.1                | 23.4                 | 25.2                    | 9.8                  |
| 19-30              | 7.7 <sup>c</sup>     | 2.2 <sup>b</sup>   | 5.7 <sup>d</sup>    | 1.6 <sup>b</sup>    | 64.1 <sup>c,d</sup> | 18.3 <sup>b</sup>    | 27.9 <sup>c</sup>       | 7.9 <sup>b</sup>     |
| 31-50              | 7.0 <sup>a,b</sup>   | 1.5 <sup>a</sup>   | 5.3 <sup>b,c</sup>  | 1.1 <sup>a</sup>    | 58.6 <sup>a,b</sup> | 12.2 <sup>a</sup>    | 26.8 <sup>a</sup>       | 5.6 <sup>c</sup>     |
| 51-70              | 6.0 <sup>a</sup>     | 1.2 <sup>a</sup>   | 5.2 <sup>d</sup>    | 1.0 <sup>a</sup>    | 57.6 <sup>a,b</sup> | 11.2 <sup>a</sup>    | 25.8 <sup>a</sup>       | 5.0 <sup>c</sup>     |
| 71+                | 6.2 <sup>a,b,c</sup> | 1.4 <sup>a</sup>   | 4.9 <sup>b,d</sup>  | 1.1 <sup>a</sup>    | 56.0 <sup>a,b</sup> | 12.4 <sup>a</sup>    | 22.4 <sup>a</sup>       | 4.9 <sup>c</sup>     |
| 19+                | 6.9                  | 1.5                | 5.4                 | 1.2                 | 59.8                | 13.4                 | 26.4                    | 5.9                  |
| Total              | 6.8                  | 1.8                | 5.0                 | 1.3                 | 59.9                | 15.6                 | 26.0                    | 6.8                  |
| <b>Cordial</b>     |                      |                    |                     |                     |                     |                      |                         |                      |
| 2-3                | 7.7                  | 0.8 <sup>b,d</sup> | 2.0 <sup>a</sup>    | 0.2 <sup>b,d</sup>  | 11.8 <sup>a,b</sup> | 1.3 <sup>a,b,d</sup> | 23.0 <sup>a</sup>       | 2.5 <sup>b,c,d</sup> |
| 4-8                | 7.3                  | 0.9 <sup>d</sup>   | 1.6 <sup>a</sup>    | 0.2 <sup>d</sup>    | 16.3 <sup>a,b</sup> | 2.0 <sup>e</sup>     | 24.3 <sup>a</sup>       | 2.9 <sup>d</sup>     |
| 9-13               | 7.6                  | 0.8 <sup>c,d</sup> | 1.9 <sup>a,b</sup>  | 0.2 <sup>c,d</sup>  | 13.3 <sup>a,b</sup> | 1.5 <sup>c,d,e</sup> | 26.4 <sup>a</sup>       | 3.0 <sup>c,d</sup>   |

|                      |                      |                    |                    |                    |                     |                      |                       |                    |
|----------------------|----------------------|--------------------|--------------------|--------------------|---------------------|----------------------|-----------------------|--------------------|
| 14-18                | 6.6                  | 0.5 <sup>b,c</sup> | 1.6 <sup>a,b</sup> | 0.1 <sup>b,c</sup> | 13.2 <sup>a,b</sup> | 1.1 <sup>b,d</sup>   | 24.3 <sup>a</sup>     | 2.0 <sup>b,c</sup> |
| 2-18                 | 7.3                  | 0.8                | 1.7                | 0.2                | 14.1                | 1.5                  | 24.9                  | 2.6                |
| 19-30                | 7.5                  | 0.5 <sup>b</sup>   | 1.8 <sup>a,b</sup> | 0.1 <sup>b</sup>   | 16.7 <sup>a,b</sup> | 1.2 <sup>b,d</sup>   | 26.3 <sup>a</sup>     | 1.8 <sup>b</sup>   |
| 31-50                | 9.1                  | 0.6 <sup>b</sup>   | 2.5 <sup>b</sup>   | 0.2 <sup>b</sup>   | 15.1 <sup>a</sup>   | 1.0 <sup>b,c,d</sup> | 31.0 <sup>a</sup>     | 2.0 <sup>b</sup>   |
| 51-70                | 7.3                  | 0.4 <sup>a,b</sup> | 2.0 <sup>a,b</sup> | 0.1 <sup>a,b</sup> | 10.2 <sup>b</sup>   | 0.5 <sup>a,b</sup>   | 25.8 <sup>a</sup>     | 1.4 <sup>a,b</sup> |
| 71+                  | 7.5                  | 0.2 <sup>a</sup>   | 1.5 <sup>a,b</sup> | 0.1 <sup>a</sup>   | 8.0 <sup>a,b</sup>  | 0.3 <sup>a</sup>     | 24.6 <sup>a</sup>     | 0.8 <sup>a</sup>   |
| 19+                  | 8.1                  | 0.5                | 2.1                | 0.1                | 14.0                | 0.8                  | 28.1                  | 1.7                |
| Total                | 7.8 <sup>2</sup>     | 0.5                | 2.0                | 0.1                | 14.0                | 1.0                  | 27.0 <sup>3</sup>     | 1.9                |
| <b>Soft drinks</b>   |                      |                    |                    |                    |                     |                      |                       |                    |
| 2-3                  | 4.2 <sup>a,b,c</sup> | 0.2 <sup>a</sup>   | 0.7 <sup>a,b</sup> | <0.1 <sup>a</sup>  | 0.9                 | 0.1                  | 14.9 <sup>a,b,c</sup> | 0.8 <sup>a</sup>   |
| 4-8                  | 5.2 <sup>a,c,d</sup> | 1.2 <sup>c</sup>   | 0.8 <sup>a</sup>   | 0.2 <sup>b,c</sup> | <0.1                | <0.1                 | 21.0 <sup>b,c</sup>   | 4.8 <sup>c</sup>   |
| 9-13                 | 6.8 <sup>b,d</sup>   | 2.3 <sup>d</sup>   | 1.2 <sup>b,c</sup> | 0.4 <sup>d</sup>   | 0.6                 | 0.2                  | 26.7 <sup>a,b</sup>   | 8.9 <sup>d</sup>   |
| 14-18                | 8.0 <sup>b</sup>     | 3.7 <sup>e</sup>   | 1.5 <sup>c,d</sup> | 0.7 <sup>e</sup>   | <0.1                | <0.1                 | 33.2 <sup>a</sup>     | 15.4 <sup>e</sup>  |
| 2-18                 | 6.9                  | 2.1                | 1.2                | 0.4                | 0.2                 | 0.1                  | 28.0                  | 8.7                |
| 19-30                | 7.3 <sup>b,d</sup>   | 3.1 <sup>d</sup>   | 1.5 <sup>d,e</sup> | 0.6 <sup>e</sup>   | <0.1                | <0.1                 | 29.9 <sup>a</sup>     | 12.9 <sup>d</sup>  |
| 31-50                | 6.0 <sup>c</sup>     | 1.9 <sup>c</sup>   | 1.5 <sup>c,e</sup> | 0.5 <sup>d</sup>   | 0.1                 | <0.1                 | 27.3 <sup>b,d</sup>   | 8.6 <sup>c</sup>   |
| 51-70                | 5.1 <sup>a</sup>     | 1.2 <sup>b</sup>   | 1.6 <sup>d</sup>   | 0.4 <sup>c</sup>   | <0.1                | <0.1                 | 21.9 <sup>c</sup>     | 5.0 <sup>b</sup>   |
| 71+                  | 5.4 <sup>a,c</sup>   | 0.7 <sup>a,b</sup> | 1.4 <sup>c,d</sup> | 0.2 <sup>a,b</sup> | 0.3                 | <0.1                 | 20.3 <sup>c,d</sup>   | 2.6 <sup>a,b</sup> |
| 19+                  | 6.2                  | 1.9                | 1.5                | 0.5                | <0.1                | <0.1                 | 26.8                  | 8.0                |
| Total                | 6.4                  | 1.9                | 1.4                | 0.4                | 0.1 <sup>+</sup>    | <0.1 <sup>+</sup>    | 27.1                  | 8.2                |
| <b>Energy drinks</b> |                      |                    |                    |                    |                     |                      |                       |                    |
| 2-3                  | -                    | -                  | -                  | -                  | -                   | -                    | -                     | -                  |
| 4-8                  | -                    | -                  | -                  | -                  | -                   | -                    | -                     | -                  |
| 9-13                 | -                    | -                  | -                  | -                  | -                   | -                    | -                     | -                  |
| 14-18                | 7.0 <sup>a</sup>     | 0.5 <sup>c</sup>   | 6.3 <sup>a,b</sup> | 0.4 <sup>c</sup>   | <0.1 <sup>a</sup>   | <0.1                 | 27.8                  | 1.9 <sup>c</sup>   |
| 2-18                 | 6.8                  | 0.2                | 6.9                | 0.2                | <0.1                | <0.1                 | 27.2                  | 0.7                |
| 19-30                | 8.5 <sup>b</sup>     | 0.6 <sup>c</sup>   | 8.0 <sup>a</sup>   | 0.5 <sup>c</sup>   | <0.1 <sup>a</sup>   | <0.1                 | 37.1                  | 2.5 <sup>c</sup>   |
| 31-50                | 8.2 <sup>a,b</sup>   | 0.2 <sup>b</sup>   | 6.4 <sup>b</sup>   | 0.2 <sup>b</sup>   | <0.1 <sup>a</sup>   | <0.1                 | 31.3                  | 0.8 <sup>b</sup>   |
| 51-70                | 6.7 <sup>a,b</sup>   | <0.1 <sup>a</sup>  | 5.9 <sup>a,b</sup> | <0.1 <sup>a</sup>  | 0.6 <sup>b</sup>    | <0.1                 | 32.8                  | 0.2 <sup>a</sup>   |
| 71+                  | -                    | -                  | -                  | -                  | -                   | -                    | -                     | -                  |
| 19+                  | 8.2                  | 0.2                | 7.3                | 0.2                | <0.1                | <0.1                 | 34.6                  | 1.0                |
| Total                | 7.9                  | 0.2                | 7.2                | 0.2                | <0.1                | <0.1 <sup>+</sup>    | 33.0 <sup>+</sup>     | 0.9                |



| <b>Oth beverages</b>  |                     |                    |                       |                      |                     |                      |                       |                      |  |
|-----------------------|---------------------|--------------------|-----------------------|----------------------|---------------------|----------------------|-----------------------|----------------------|--|
| 2-3                   | 6.2 <sup>a</sup>    | 0.4 <sup>b,c</sup> | 12.0 <sup>a</sup>     | 0.8 <sup>b,c</sup>   | 4.9                 | 0.3 <sup>a,b</sup>   | 15.6 <sup>a,b</sup>   | 1.0 <sup>b,c</sup>   |  |
| 4-8                   | 7.0 <sup>a</sup>    | 0.4 <sup>b</sup>   | 23.4 <sup>a,b</sup>   | 1.4 <sup>b</sup>     | 4.3                 | 0.2 <sup>b</sup>     | 12.3 <sup>a,b</sup>   | 0.7 <sup>b</sup>     |  |
| 9-13                  | 6.1 <sup>a</sup>    | 0.5 <sup>c</sup>   | 18.3 <sup>a,b</sup>   | 1.6 <sup>c</sup>     | 5.8                 | 0.5 <sup>b</sup>     | 13.0 <sup>a</sup>     | 1.1 <sup>c</sup>     |  |
| 14-18                 | 12.4 <sup>b</sup>   | 0.7 <sup>b,c</sup> | 39.4 <sup>c</sup>     | 2.3 <sup>b,c</sup>   | 5.7                 | 0.3 <sup>a,b</sup>   | 24.4 <sup>b</sup>     | 1.4 <sup>b,c</sup>   |  |
| 2-18                  | 7.9                 | 0.5                | 23.9                  | 1.6                  | 5.3                 | 0.4                  | 15.9                  | 1.1                  |  |
| 19-30                 | 7.1 <sup>a</sup>    | 0.4 <sup>b</sup>   | 20.6 <sup>a,b</sup>   | 1.3 <sup>b</sup>     | 5.5                 | 0.3 <sup>b</sup>     | 16.6 <sup>a,b</sup>   | 1.0 <sup>b</sup>     |  |
| 31-50                 | 8.2 <sup>a,b</sup>  | 0.1 <sup>a</sup>   | 25.1 <sup>b,c</sup>   | 0.5 <sup>a</sup>     | 3.3                 | 0.1 <sup>a</sup>     | 18.1 <sup>a,b</sup>   | 0.3 <sup>a</sup>     |  |
| 51-70                 | 8.6 <sup>a,b</sup>  | 0.1 <sup>a</sup>   | 23.5 <sup>a,b,c</sup> | 0.4 <sup>a</sup>     | 10.9                | 0.2 <sup>a,b</sup>   | 18.5 <sup>a,b</sup>   | 0.3 <sup>a</sup>     |  |
| 71+                   | 7.1 <sup>a,b</sup>  | 0.1 <sup>a</sup>   | 19.7 <sup>a,b</sup>   | 0.4 <sup>a</sup>     | 10.7                | 0.2 <sup>a,b</sup>   | 18.9 <sup>a,b</sup>   | 0.4 <sup>a</sup>     |  |
| 19+                   | 7.6                 | 0.2                | 22.1                  | 0.6                  | 6.2                 | 0.2                  | 17.4                  | 0.5                  |  |
| Total                 | 7.7                 | 0.3                | 22.8                  | 0.9                  | 5.9 <sup>†</sup>    | 0.2                  | 16.8                  | 0.6                  |  |
| <b>Plain milk</b>     |                     |                    |                       |                      |                     |                      |                       |                      |  |
| 2-3                   | 16.3 <sup>d</sup>   | 8.9 <sup>d</sup>   | 43.2 <sup>d</sup>     | 23.6 <sup>d</sup>    | 1.1 <sup>a</sup>    | 0.6 <sup>a,b,c</sup> | 24.1 <sup>e</sup>     | 13.2 <sup>e</sup>    |  |
| 4-8                   | 9.8 <sup>c</sup>    | 3.1 <sup>c</sup>   | 31.9 <sup>a,c</sup>   | 10.0 <sup>c</sup>    | 0.5 <sup>a</sup>    | 0.2 <sup>a,b</sup>   | 16.1 <sup>a,b,c</sup> | 5.0 <sup>d</sup>     |  |
| 9-13                  | 9.9 <sup>c</sup>    | 2.7 <sup>c</sup>   | 35.2 <sup>b,c</sup>   | 9.6 <sup>c</sup>     | 0.8 <sup>a,b</sup>  | 0.2 <sup>b</sup>     | 16.5 <sup>b,d</sup>   | 4.5 <sup>d</sup>     |  |
| 14-18                 | 11.3 <sup>c,d</sup> | 1.3 <sup>a,b</sup> | 41.6 <sup>c,d</sup>   | 4.7 <sup>a,b</sup>   | 0.3 <sup>a</sup>    | <0.1 <sup>a</sup>    | 18.7 <sup>c,d,e</sup> | 2.1 <sup>a,c</sup>   |  |
| 2-18                  | 11.5                | 3.1                | 36.7                  | 9.9                  | 0.7                 | 0.2                  | 18.4                  | 5.0                  |  |
| 19-30                 | 11.1 <sup>c</sup>   | 1.4 <sup>b</sup>   | 37.4 <sup>b,c,d</sup> | 4.8 <sup>b</sup>     | 1.9 <sup>a,b</sup>  | 0.3 <sup>a,b</sup>   | 22.0 <sup>e</sup>     | 2.8 <sup>b,c</sup>   |  |
| 31-50                 | 7.2 <sup>a,b</sup>  | 0.6 <sup>a</sup>   | 28.2 <sup>a</sup>     | 2.2 <sup>a</sup>     | 0.6 <sup>a,b</sup>  | 0.1 <sup>a</sup>     | 14.4 <sup>a,b</sup>   | 1.2 <sup>a</sup>     |  |
| 51-70                 | 6.5 <sup>a</sup>    | 0.5 <sup>a</sup>   | 26.3 <sup>a</sup>     | 2.1 <sup>a</sup>     | 0.7 <sup>c</sup>    | 0.1 <sup>c</sup>     | 14.0 <sup>a</sup>     | 1.1 <sup>a</sup>     |  |
| 71+                   | 8.9 <sup>b,c</sup>  | 0.8 <sup>a,b</sup> | 29.8 <sup>a,b</sup>   | 2.8 <sup>a,b</sup>   | 0.8 <sup>b,c</sup>  | 0.1 <sup>a,b,c</sup> | 14.6 <sup>a,b,c</sup> | 1.4 <sup>a,b</sup>   |  |
| 19+                   | 8.5                 | 0.8                | 31.0                  | 2.9                  | 1.1                 | 0.1                  | 16.9                  | 1.6                  |  |
| Total                 | 9.9                 | 1.3                | 33.6                  | 4.4                  | 0.9                 | 0.1                  | 17.6                  | 2.3                  |  |
| <b>Flavoured milk</b> |                     |                    |                       |                      |                     |                      |                       |                      |  |
| 2-3                   | 17.5 <sup>b</sup>   | 2.4 <sup>b,c</sup> | 46.3 <sup>b</sup>     | 6.3 <sup>b,c,d</sup> | 13.9 <sup>a</sup>   | 1.9 <sup>b,c</sup>   | 28.2 <sup>a,b,c</sup> | 3.8 <sup>b,c,d</sup> |  |
| 4-8                   | 12.9 <sup>a,b</sup> | 2.6 <sup>c,d</sup> | 38.2 <sup>a,b</sup>   | 7.7 <sup>d,e</sup>   | 8.1 <sup>a,b</sup>  | 1.6 <sup>c</sup>     | 23.0 <sup>b</sup>     | 4.6 <sup>d,e</sup>   |  |
| 9-13                  | 13.8 <sup>b</sup>   | 3.0 <sup>d</sup>   | 38.5 <sup>a,b</sup>   | 8.4 <sup>e</sup>     | 10.7 <sup>a,b</sup> | 2.3 <sup>c</sup>     | 29.1 <sup>c</sup>     | 6.4 <sup>e</sup>     |  |
| 14-18                 | 16.2 <sup>b</sup>   | 2.8 <sup>c,d</sup> | 41.0 <sup>b</sup>     | 7.0 <sup>d,e</sup>   | 15.5 <sup>a,b</sup> | 2.6 <sup>c</sup>     | 30.0 <sup>c</sup>     | 5.1 <sup>d,e</sup>   |  |
| 2-18                  | 14.5                | 2.8                | 39.7                  | 7.6                  | 11.4                | 2.2                  | 27.4                  | 5.2                  |  |
| 19-30                 | 15.3 <sup>b</sup>   | 1.9 <sup>b</sup>   | 42.0 <sup>b</sup>     | 5.2 <sup>c</sup>     | 13.7 <sup>a,b</sup> | 1.7 <sup>b</sup>     | 32.0 <sup>c</sup>     | 4.0 <sup>c</sup>     |  |
| 31-50                 | 14.9 <sup>b</sup>   | 1.5 <sup>b</sup>   | 39.9 <sup>b</sup>     | 3.9 <sup>b,c</sup>   | 9.8 <sup>b</sup>    | 1.0 <sup>b</sup>     | 30.6 <sup>c</sup>     | 3.0 <sup>b,c</sup>   |  |

|                  |                     |                    |                      |                    |                     |                    |                     |                    |
|------------------|---------------------|--------------------|----------------------|--------------------|---------------------|--------------------|---------------------|--------------------|
| 51-70            | 13.6 <sup>a,b</sup> | 0.8 <sup>a</sup>   | 38.0 <sup>a,b</sup>  | 2.1 <sup>a</sup>   | 9.1 <sup>a,b</sup>  | 0.5 <sup>a</sup>   | 29.7 <sup>a</sup>   | 1.7 <sup>a</sup>   |
| 71+              | 12.1 <sup>a</sup>   | 1.0 <sup>a,b</sup> | 33.0 <sup>a</sup>    | 2.9 <sup>a,b</sup> | 6.7 <sup>b</sup>    | 0.6 <sup>a,b</sup> | 22.9 <sup>a,b</sup> | 2.0 <sup>a,b</sup> |
| 19+              | 14.5                | 1.3                | 39.6                 | 3.6                | 10.7                | 1.0                | 30.2                | 2.8                |
| Total            | 14.5                | 1.6                | 39.6                 | 4.5                | 10.9                | 1.2                | 29.1                | 3.3                |
| <b>Milk alts</b> |                     |                    |                      |                    |                     |                    |                     |                    |
| 2-3              | -                   | -                  | -                    | -                  | -                   | -                  | -                   | -                  |
| 4-8              | -                   | -                  | -                    | -                  | -                   | -                  | -                   | -                  |
| 9-13             | -                   | -                  | -                    | -                  | -                   | -                  | -                   | -                  |
| 14-18            | -                   | -                  | -                    | -                  | -                   | -                  | -                   | -                  |
| 2-18             | 11.0                | 0.1                | 31.6                 | 0.3                | 8.4                 | 0.1                | 16.4                | 0.1                |
| 19-30            | -                   | -                  | -                    | -                  | -                   | -                  | -                   | -                  |
| 31-50            | 6.9 <sup>a</sup>    | 0.1                | 22.0 <sup>a</sup>    | 0.2                | 1.4 <sup>a</sup>    | <0.1               | 11.5 <sup>a</sup>   | 0.1                |
| 51-70            | 8.1 <sup>a</sup>    | 0.1                | 25.6 <sup>a</sup>    | 0.2                | 4.0 <sup>a</sup>    | <0.1               | 12.8 <sup>a</sup>   | 0.1                |
| 71+              | -                   | -                  | -                    | -                  | -                   | -                  | -                   | -                  |
| 19+              | 7.8                 | 0.1                | 24.9                 | 0.3                | 1.8                 | <0.1               | 11.5                | 0.1                |
| Total            | 8.4                 | 0.1                | 26.1                 | 0.3                | 3.0                 | <0.1               | 12.4                | 0.1                |
| <b>Alcohol</b>   |                     |                    |                      |                    |                     |                    |                     |                    |
| 2-3              | -                   | -                  | -                    | -                  | -                   | -                  | -                   | -                  |
| 4-8              | -                   | -                  | -                    | -                  | -                   | -                  | -                   | -                  |
| 9-13             | -                   | -                  | -                    | -                  | -                   | -                  | -                   | -                  |
| 14-18            | 17.6 <sup>a,b</sup> | 0.9 <sup>a</sup>   | 3.9 <sup>a,b,c</sup> | 0.2 <sup>a</sup>   | 12.8 <sup>a,b</sup> | 0.7 <sup>a</sup>   | 29.0 <sup>c</sup>   | 1.6 <sup>a</sup>   |
| 2-18             | 16.0                | 0.3                | 3.5                  | 0.1                | 11.4                | 0.2                | 25.8                | 0.4                |
| 19-30            | 18.0 <sup>a,b</sup> | 4.4 <sup>b</sup>   | 6.1 <sup>b,c</sup>   | 1.5 <sup>b</sup>   | 22.8 <sup>b</sup>   | 5.5 <sup>b</sup>   | 11.7 <sup>b</sup>   | 2.8 <sup>b</sup>   |
| 31-50            | 17.4 <sup>b</sup>   | 5.9 <sup>c</sup>   | 6.0 <sup>c</sup>     | 2.0 <sup>c</sup>   | 18.6 <sup>b</sup>   | 6.3 <sup>c</sup>   | 7.4 <sup>a</sup>    | 2.5 <sup>c</sup>   |
| 51-70            | 17.3 <sup>b</sup>   | 6.7 <sup>d</sup>   | 6.5 <sup>a</sup>     | 2.5 <sup>d</sup>   | 18.7 <sup>b</sup>   | 7.2 <sup>d</sup>   | 4.6 <sup>a,b</sup>  | 1.8 <sup>d</sup>   |
| 71+              | 14.0 <sup>a</sup>   | 4.5 <sup>b</sup>   | 4.1 <sup>b</sup>     | 1.3 <sup>c</sup>   | 11.4 <sup>a</sup>   | 3.7 <sup>b,c</sup> | 3.6 <sup>a</sup>    | 1.2 <sup>b,d</sup> |
| 19+              | 17.1                | 5.6                | 6.0                  | 2.0                | 18.7                | 6.1                | 6.9                 | 2.3                |
| Total            | 17.1                | 4.4                | 6.0                  | 1.5                | 18.6                | 4.8                | 7.2                 | 1.9                |
| <b>Water</b>     |                     |                    |                      |                    |                     |                    |                     |                    |
| 2-3              | <0.1                | <0.1               | 2.0                  | 1.8                | <0.1                | <0.1               | <0.1                | <0.1               |
| 4-8              | <0.1                | <0.1               | 2.6                  | 2.4                | <0.1                | <0.1               | <0.1                | <0.1               |
| 9-13             | <0.1                | <0.1               | 3.0                  | 2.8                | 0.1                 | 0.1                | <0.1                | <0.1               |

|       |      |      |     |     |      |      |      |      |
|-------|------|------|-----|-----|------|------|------|------|
| 14-18 | <0.1 | <0.1 | 3.8 | 3.2 | 0.1  | 0.1  | <0.1 | <0.1 |
| 2-18  | <0.1 | <0.1 | 3.0 | 2.7 | <0.1 | <0.1 | <0.1 | <0.1 |
| 19-30 | 0.1  | 0.1  | 4.4 | 3.9 | 0.1  | 0.1  | 0.2  | 0.1  |
| 31-50 | 0.1  | 0.1  | 3.9 | 3.4 | 0.2  | 0.1  | 0.1  | 0.1  |
| 51-70 | <0.1 | <0.1 | 3.7 | 3.0 | <0.1 | <0.1 | <0.1 | <0.1 |
| 71+   | <0.1 | <0.1 | 3.0 | 2.4 | 0.1  | 0.1  | 0.1  | 0.1  |
| 19+   | 0.1  | 0.1  | 3.9 | 3.3 | 0.1  | 0.1  | 0.1  | 0.1  |
| Total | 0.1  | <0.1 | 3.7 | 3.2 | 0.1  | 0.1  | 0.1  | 0.1  |

<sup>1</sup>All percentages are population weighted, estimates with the same superscripts are not statistically significantly different. <sup>2</sup>no evidence for statistical difference between age categories  
<sup>3</sup>hypothesis that age category estimates are from the same distribution is rejected (p<0.05) but no statistically significant difference for pairwise comparisons
